1 **Dynamic plant height QTL revealed in maize through remote sensing**  
2 **phenotyping using a high-throughput unmanned aerial vehicle (UAV)**

3

4 Xiaqing Wang<sup>1,5</sup>, Ruyang Zhang<sup>1,5</sup>, Liang Han<sup>2,3,5</sup>, Hao Yang<sup>2</sup>, Wei Song<sup>1</sup>, Xiaolei Liu<sup>4</sup>, Xuan  
5 Sun<sup>1</sup>, Meijie Luo<sup>1</sup>, Kuan Chen<sup>1</sup>, Yunxia Zhang<sup>1</sup>, Guijun Yang<sup>2,\*</sup>, Yanxin Zhao<sup>1,\*</sup>, Jiuran Zhao<sup>1,\*</sup>

6

7 <sup>1</sup> Beijing Key Laboratory of Maize DNA Fingerprinting and Molecular Breeding, Maize  
8 Research Center, Beijing Academy of Agriculture & Forestry Sciences, Beijing 100097,  
9 China

10 <sup>2</sup> Key Laboratory of Quantitative Remote Sensing in Agriculture of Ministry of Agriculture,  
11 Beijing Research Center for Information Technology in Agriculture, Beijing 100097, China.

12 <sup>3</sup> College of Architecture and Geomatics Engineering, Shanxi Datong University Datong,  
13 Datong 037009, China.

14 <sup>4</sup> Key Laboratory of Agricultural Animal Genetics, Breeding and Reproduction, Ministry of  
15 Education, College of Animal Science and Technology, Huazhong Agricultural University,  
16 Wuhan 430070, Hubei, China .

17 <sup>5</sup> These authors contributed equally to this work.

18 \* To whom correspondence should be addressed. Tel: 0086-010-51502407;  
19 [guijun.yang@163.com](mailto:guijun.yang@163.com) or [rentlang2003@163.com](mailto:rentlang2003@163.com) or [maizezhao@126.com](mailto:maizezhao@126.com).

20

21

22 **Running title:** Dynamic plant height revealed by unmanned aerial vehicle

23

24

25

26

27

28

29

30

31

32

33

34 **Highlight**

35 We used UAV-based sensing platform to investigate plant height over 4 growth stages  
36 for different maize populations, and detected numbers of reliable QTLs using GWAS.

37

38 **Abstract**

39 Plant height is the key factor for plant architecture, biomass and yield in maize  
40 (*Zea mays*). In this study, plant height was investigated using unmanned aerial vehicle  
41 high-throughput phenotypic platforms (UAV-HTPPs) for maize diversity inbred lines  
42 at four important growth stages. Using an automated pipeline, we extracted accurate  
43 plant heights. We found that in temperate regions, from sowing to the jointing period,  
44 the growth rate for temperate maize was faster than tropical maize. However, from  
45 jointing to flowering stage, tropical maize maintained a vigorous growth state, and  
46 finally resulted in a taller plant than temperate lines. Genome-wide association study  
47 for temperate, tropical and both groups identified a total of 238 quantitative trait locus  
48 (QTLs) for the 16 plant height related traits over four growth periods. And, we found  
49 that plant height at different stages were controlled by different genes, for example,  
50 *PIN1* controlled plant height at the early stage and *PIN11* at the flowering stages. In  
51 this study, the plant height data collected by the UAV-HTTPs were credible and the  
52 genetic mapping power is high, indicating that the application of this UAV-HTTPs  
53 into the study of plant height will have great prospects.

54

55 **Key words:** Dynamic plant height, GWAS, High-throughput phenotype, QTL,  
56 Temperate maize, Tropical maize, Unmanned aerial vehicle.

57

58 **Abbreviations**

59 BOTH, Both of temperate and tropical maize; CSMs, Crop surface models; CV,  
60 Coefficient of variation; DEM, Digital elevation model; DGRPH, Daily growth rate of  
61 plant height; DIPH, Daily incremental plant height; DSMs, Digital surface models;  
62 EGI, Excess Green Index; GCPs, Ground control points; GPS, Global positioning  
63 system; GRPH, Growth rate of plant height; IPH, Incremental plant height; MAF,  
64 Minor allele frequency; PH, Plant height; QTL, Quantitative trait locus; SNP, Single  
65 nucleotide polymorphism; TEM, Temperate maize; TST, Tropical maize; UVA,  
66 Unmanned aerial vehicle; UAV-HTPPs, Unmanned aerial vehicle high-throughput  
67 phenotypic platforms

## 68 **Introduction**

69 Maize (*Zea mays*) was domesticated from Balsas teosinte (*Zea mays* subspecies  
70 *parviglumis*) in southwestern Mexico around 9,000 y BP (van Heerwaarden et al.,  
71 2011). Subsequently, maize has been continuously improved by humans, and the most  
72 important improvements were spread from the tropical region to the temperate region,  
73 which can be called adaptation (Liu et al., 2015). The adaptation process allowed  
74 maize to be widely cultivated worldwide and become the largest production food crop  
75 in the world (<http://faostat3.fao.org/compare/E>). However, the world population is  
76 soaring and the demand for food is also increasing. It has been reported that the  
77 world's grain demand must meet a target of 70% increase by 2050 (Tester and  
78 Langridge, 2010). Therefore, corn, the largest grain, has become particularly  
79 important in safeguarding world food security.

80 Maize yield is highly complex and is affected by many factors, among which  
81 plant height is a particularly important factor because it not only affects the lodging  
82 resistance, but also biomass and yield (Salas Fernandez 2009). In the first Green  
83 Revolution, with the successful application of the semi-dwarf genes (*rht1*; *sd1*) in  
84 wheat and rice, the crop yields increased dramatically (Peng et al., 1999; Khush et al.,  
85 2001; Sasaki et al., 2002). Plant height was so important that people have made  
86 unremitting efforts to exploring its genetic mechanism. So far, there were plenty of  
87 quantitative trait loci (QTLs) identified for maize plant height using a diversity of  
88 genetic populations (Peiffer et al., 2014; Yang et al., 2014; Dell'Acqua et al., 2015;  
89 Zhou et al., 2016; Pan et al., 2017). Some of these genes were cloned, such as *an1*,  
90 *dwarf3*, *dwarf8*, *dwarf9* and *br2*, which were mainly involved in the synthesis and  
91 transportation of gibberellin and auxin (Winkler and Freeling, 1994; Bensen et al.,  
92 1995; Winkler et al., 1995; Fujioka et al., 1988; Xing et al., 2012).

93 Maize plant height showed different characteristics during the whole growth  
94 period, especially in the important growth stages, such as the seeding, jointing,  
95 flowering and mature stages (Abendroth et al., 2011). Usually, maize grows slowly in  
96 the seedling stage, fast in the jointing stage, then gradually slower in the grouting  
97 stage, and stops in the milky stage (Zhang et al., 2012). However, for a long time,  
98 researchers have often investigated the plant height at the mature stage to obtain the  
99 final height, leading to a lack of systemic understanding of the entire plant height  
100 development process and the genetic factors of its genetic development mechanism.  
101 Furthermore, the workload of manual measurement also contributed to plant height

102 typically only being investigated at one growth stage.

103 Manually investigating plant height is a laborious and time-consuming task. Since  
104 plants are tall at maturity, errors are unavoidable in the measurement process and the  
105 accuracy of the data will be affected. In recent years, with the development of  
106 artificial intelligence, a series of high-throughput automated phenotypic systems have  
107 been developed. At present, indoor platform systems are widely used for dissecting  
108 phenotypic traits in which environmental effects are minimized (Yang et al., 2014;  
109 Zhang et al., 2016; Al-Tamimi et al., 2017); however, field high-throughput platforms  
110 have much fewer applications within the complex environment that farmers routinely  
111 experience (Crain et al., 2016; Liang et al., 2018). Compared with indoor platforms,  
112 the development of field high-throughput platforms requires high flexibility and a  
113 large payload (Araus and Cairns, 2014). Thanks to the advance in remote sensing,  
114 aeronautics and high-performance computing development, some field-based  
115 high-throughput phenotypic platforms (HTPPs) have been developed (Araus and  
116 Cairns, 2014). For example, the Australian Plant Phenomics Facility  
117 (<http://www.plantphenomics.org/hrppc/capabilities/technology>), and ground-based  
118 HTPPs used for wheat, cotton, sorghum and maize, which can determine the canopy  
119 height, reflectance, temperature, plant height, biomass and so on (Andrade-Sanchez et  
120 al., 2013; Holman 2016; Duan et al., 2017; Liang et al., 2018). However, these  
121 field-based HTPPs have very few applications in genetic improvement, especially for  
122 genetic mapping.

123 To better understand the dynamic plant height mechanism, we investigated the  
124 plant height through four growth periods with an unmanned aerial vehicle (UAV)  
125 system for maize diversity inbred lines, which covers wide genetic diversity and is  
126 widely used in maize genetic research (Yang et al., 2011; Yang et al., 2014; Liu et al.,  
127 2017). Through this design, we hope to explore more plant height characteristics with  
128 the aid of the high-throughput UAV and data processing procedures, and then dissect  
129 the genetic basis for plant height for different maize groups at different stages.

130

## 131 **Materials and methods**

### 132 **Plant materials and experiment design**

133 The maize natural population used in this study was a subset of Yang (Yang et al.,  
134 2010), consisting of 117 temperate lines and 135 tropical lines, which had a  
135 high-density genotype of 1.25 million single nucleotide polymorphism (SNPs) with

136 minor allele frequency (MAF) more than 0.05 (Liu et al., 2017). The population was  
137 sown on 15 May 2017 at Xiao Tang Shan, Changping, Beijing National Precision  
138 Agriculture Research Center of China (115°E, 40°N). The land plots were flat, with  
139 uniform soil fertility. There was a row length of 2 m, including eight plants, and each  
140 line included three rows. Row-to-row distance was set as 65 cm. Phenotypic data  
141 collection with UAV was carried out on 8 June, 29 June, 11 July and 3 August 2017,  
142 days with clear sky and no wind (Table 1; Fig. 1A). On the same days, the height of  
143 44 randomly selected plants was manually measured with a ruler.

144

#### 145 **Platform and image acquisition**

146 An Octocopter UAV (DJI Spreading Wings S1000) platform was used to collect a  
147 set of aerial images across four flights (Fig. 1B). A 20.2-megapixel digital camera  
148 (Cyber-shot DSC-QX100) was mounted on the UAV to acquire the images by means  
149 of a global positioning system (GPS) and inertial navigation unit system. In each  
150 flight, the same flight plan was followed with 80% forward overlap and 75% side  
151 overlap at an altitude of approximately 40–60 m, depending on the sun situation. The  
152 flight routes were programmed into the UAV software to automatically generate  
153 efficient flight paths for UAV. Each flight speed was set to 6 m/s. International  
154 Standards Organization sensitivity and shutter speed were set to automatic, and the  
155 focal length was fixed at 10.4 mm. The flight time was within 15 min. Sixteen ground  
156 control points (GCPs), measured using millimeter-accuracy differential GPS (South  
157 Surveying & Mapping Instrument Co., Ltd., China), were evenly distributed in the  
158 field to obtain an accurate geographical reference from multiple dates.

159

#### 160 **Plant height image data extraction and verification**

161 Digital surface models (DSMs) and orthomosaics were produced from images  
162 shot by UAV with GCPs using the structure-from-motion software Agisoft PhotoScan  
163 1.3 (Agisoft LLC, St. Petersburg, Russia) (Fig. 1B). This process included feature  
164 point matching, dense point cloud generation, product output, etc. A digital elevation  
165 model (DEM) (i.e., a non-vegetation ground model) was constructed from the first set  
166 of aerial images collected 24 days after sowing by the local polynomial interpolation  
167 method. Crop surface models (CSMs) were calculated by subtracting the DSM at  
168 different plant growth stages from the DEM (Fig. 1B, Hoffmeister et al., 2010; Bendig  
169 et al., 2013; Hoffmeister et al., 2013). The CSM includes a raster dataset that mixes

170 the soil and plant pixels. Many studies have shown that extracting plant height  
171 directly from CSM results in underestimation (Bendig et al., 2015; Holman et al.,  
172 2016; Watanabe et al., 2017). Segmenting plants from soils using the excess green  
173 index proposed by Woebbecke et al. (1995) was a necessary measure for the above  
174 extraction. Kriging spatial interpolation and maximum adjacent pixel methods were  
175 performed on CSMs to remove the soil background, and the maximum of  
176 interpolation was taken as the representative value of plant height at the plot scale. To  
177 assess the accuracy of plant height extraction from UAV, 44 maize plants were  
178 randomly selected to manually measure plant height at the second, third and fourth  
179 timepoints of plant growth. A linear regression model was applied with multiple dates  
180 using R v. 3.2.4 statistical software.

181

### 182 **Plant height variation between temperate and tropical maize**

183 A total of 252 maize inbred lines, consisting of 117 temperate lines and 135  
184 tropical lines, were used in this study. Plant heights were evaluated at four different  
185 growth stages, and a total of 16 plant height related traits were calculated, including 4  
186 absolute plant height traits (PH), 3 incremental plant height difference (IPH), 3  
187 growth rates of plant height (GRPH), 3 daily incremental plant height difference  
188 (DIPH) and 3 daily growth rates of plant height (DGRPH). The PH represents the  
189 absolute plant height at each timepoint. The IPH represents the difference between the  
190 adjacent timepoints, e.g.  $IPH_{1t2} = PH_2 - PH_1$ . The GRPH was  
191 calculated as the ratio of IPH divided by the former plant height, e.g.  $GRPH_{1t2} =$   
192  $IPH_{1t2} / PH_1$ . The DIPH was the IPH divided by the total days  
193 between the adjacent timepoints. Finally, the DGRPH was calculated as the GRPH  
194 divided by the total days between the adjacent timepoints. The phenotypic distribution  
195 and graphs were implemented in the R v. 3.2.4 statistical software.

196

### 197 **Association analysis for plant height**

198 Genome-wide association study (GWAS) was carried out in temperate (TEM),  
199 tropical (TST) maize and both of the two e population (BOTH). Genotype data  
200 quality control was performed separately, with 1,141,328, 1,110,483 and 1,227,441  
201 SNPs remaining for TEM, TST and BOTH groups, respectively. We used 16  
202 plant-height-related traits in the GWAS program, including PH, IPH, GRPH, DIPH  
203 and DGRPH traits for the three groups. Combined with phenotypes and genotypes,

204 the FarmCPU model in the MVP software package, which iteratively uses fixed and  
205 random effect model, was used for association tests in TEM and TST groups with  
206 only kinship considered (Al-Tamimi et al., 2016; Liu et al., 2016). For the BOTH  
207 population, the top five principal components were added in FarmCPU model to  
208 control false positives, which may be caused by population stratification and the  
209 non-genetic effect (Al-Tamimi et al., 2016; Liu et al., 2016). The adjusted Bonferroni  
210 method (i.e.,  $P \leq 1/N$ , where  $N$  is the total number of genome-wide SNPs) was used  
211 as the global  $P$  value cutoff to declare significance of SNPs associated with a given  
212 trait. The  $P$  values were  $8.76e-7$ ,  $9.0e-7$  and  $8.14e-7$  for the TEM, TST and BOTH  
213 populations, respectively. QTL intervals were calculated as the upstream and  
214 downstream 100kb for each significant SNP (Deng et al., 2017). Any SNP in the  
215 QTL interval with the lowest  $P$  value was considered as the peak SNP.

216 We searched the genes in each QTL according to the physical position of each  
217 gene in maizeGDB (<https://www.maizegdb.org/>). Gene annotations were based on  
218 both maizeGDB and InterProScan database ([http://www.](http://www.ebi.ac.uk/interpro/scan.html)  
219 [ebi.ac.uk/interpro/scan.html](http://www.ebi.ac.uk/interpro/scan.html)). The gene expression profiles were also from  
220 maizeGDB.

221

## 222 **Results**

### 223 **High-throughput digital plant height extraction and validation**

224 To investigate the plant height of 117 temperate and 135 tropical maize inbred  
225 lines for the four stages, we used the unmanned aerial vehicle high-throughput  
226 phenotypic platform (UAV-HTTP) system to collect the image data. We carried out  
227 four flights during the whole development stage of maize during the seedling, jointing,  
228 trumpet and flowering periods (the V5, V10, V12 and R stages at 24, 45, 57 and 80  
229 days after seeding, respectively). On each flight, the average flight altitude was 52.5  
230 m. A total of 559 original images were taken on four flights (Table 2). Using the  
231 self-developed automated data extraction process, we first filtered the original images,  
232 and retained 460 high-quality images, with an average of 115 images per flight. After  
233 the reconstruction of the orthomosaic model, the obtained image ground resolution  
234 was 1.15 cm/pixel. The DSM was constructed using the orthomosaic model output  
235 point cloud data. The average image accuracy of the DSM was 2.31 cm/pixel. The  
236 DEM was generated by interpolation of the DSM points located on the surface of the

237 bare land. Finally, we obtained the CSM containing bare soil (DSM – DEM, Fig. 1B).  
238 Here, the tiny terrain at the bottom of the crop can be ignored because whole plant  
239 area was flatted by a farmland leveling machine. Therefore, CSM is equivalent to crop  
240 height. The average coefficient of variation (CV) of plant height gradually decreased  
241 from 53% to 11.6% among first three growth stages caused by the increasing  
242 heterogeneity of plant height. The mean crop height ranged from 9.6 to 253.4 cm  
243 among the four periods with an average growth rate of 4.06 cm/d (Table 2).

244 To verify the accuracy of the plant height data extracted using UAV-HTTP, 44  
245 lines were randomly selected for plant height measurement by ruler at the same time  
246 as the 2nd, 3rd and 4th flight. A linear regression model was established for the  
247 UAV-HTTP data and ruler measurement data and the model correlation coefficient  
248 was very high ( $r^2= 0.91$ ), indicating that the data obtained by the UAV platform had  
249 high accuracy (Fig. 2).

250

### 251 **Plant height varies greatly at different stages of development**

252 Based on the accurate plant height data obtained by UAV-HTTP, we performed  
253 further analysis of the variation for maize plant height across the four growth stages  
254 among the three different groups (Table 3). For the BOTH group, the average PH  
255 were between 13.66 and 218.26 cm, from the first to the fourth flight (Fig. 1C). The  
256 DIPH values for the three adjacent periods were from 3.68 to 4.74 cm, with the  
257 maximum for 2t3 stages, and minimum for 3t4 stages. However, the DGRPH values  
258 varied from 0.02 to 0.31, with the maximum for 1t2 stages, and minimum for 3t4  
259 stages. The inconsistency for DIPH and DGRPH indicate that growth rate was not  
260 positively correlate to incremental growth.

261 We conducted a correlation analysis for the BOTH group to reveal the  
262 relationship between the 16 traits at different plant stages (Fig. 3). A strong positive  
263 correlation was found between IPH and DIPH, GRPH and DGRPH. Second,  
264 correlations for PHs at different stages were also positively related, from 0.14 to 0.73.  
265 Third, the correlation between IPHs was weak ranging from -0.25 to 0.05. PHRs  
266 were also weakly related to each other, from -0.09 to 0.1. However, there was a  
267 positive correlation between IPH and PH, ranging from -0.28 to 0.94. The correlation  
268 between GRPH and PH was mainly negative, ranging from -0.73 to 0.62. In addition,  
269 the correlation between IPH and GR was relatively variable, ranging from -0.57 to  
270 0.95.



271 As the wide diversity of the BOTH group, we divided the group into TEM and  
272 TST groups, and found the plant height between TEM and TST maize exhibited a  
273 significant difference at each growth stage (Fig. 4). From the first to the third flight  
274 (namely 1t2 and 2t3 stages) the DIPH values for TEM and TST were 3.87 vs. 3.52 cm  
275 and 4.97 vs. 4.53 cm, respectively, showing that TEM maize consistently grew faster  
276 than the TST maize. However, from the third to the fourth period, the TST grew faster  
277 than the TEM maize, and the DIPH for TEM and TST were 2.32 vs. 3.79 cm. More  
278 importantly, the most significant difference for the two groups were at 3t4 stage when  
279 most TEM lines were flowering, while most TST lines were still in vegetative growth.

280

### 281 **Genetic basis affecting the dynamic development of plant height**

282 In view of the above-mentioned differences in plant height and related traits in  
283 different groups and at different stages of growth, we conducted GWAS for the 16  
284 plant height related traits in the TEM, TST, and BOTH groups. A total of 238 QTLs  
285 were detected, covering 10 chromosomes of the maize genome (Data S1-S5; Fig.  
286 S1-S4). There were 38, 49, 50, 50 and 51 QTLs detected for PH, IPH, GRPH, DIPH  
287 and DGRPH traits, respectively.

288 To verify the accuracy of the QTL, we compared the previously reported QTLs  
289 and genes related to plant height and found that 45% of the QTLs overlapped with  
290 previous research (Peiffer et al., 2014; Yang et al., 2014; Dell'Acqua et al., 2015; Zhou  
291 et al., 2016; Pan et al., 2017). In addition, genes involving the GA and auxin pathway  
292 were also detected to be associated with plant height, such as *ARFTF4*, *D3*, *GA2OX8*,  
293 *KS3*, *PINI* and *PIN11*, indicating that the QTL results of this study were highly  
294 reliable (Tudroszen et al., 1977; Winkler and Helentjaris, 1995; Lo et al., 2008;  
295 Yamaguchi, 2008; Li et al., 2016; Weijers et al., 2018). Furthermore, 55% of QTLs  
296 were newly identified in the present study, including traits related to plant height and  
297 growth rate. Combining a large number of validated and new QTLs, we can discover  
298 the genetic basis affecting the dynamic development of plant height.

299 First, plant height at different stages was controlled by different QTLs. There  
300 were 6, 6, 2 and 24 loci detected for PH traits at the V5, V10, V12 and R stages,  
301 respectively (Fig.5; Data S1). More QTLs at the flowering stage were detected than at  
302 other stages. However, comparison of the QTLs for the four developmental stages did  
303 not show any overlapping regions, suggesting that plant height was controlled by  
304 different genes at different stages. For example, at the V5 stage, the gene *PINI*, an

305 auxin transport protein (Kumari et al., 2015), was detected near to the QTL of chr9:  
306 3.23-3.43Mb for the TEM group. The expression profile of *PINI* in B73 showed high  
307 expression in the early stem, indicating that the gene may involve in the early stages  
308 of development. At the R stage, the gene *PINII* which is an auxin efflux carrier  
309 family protein (Tudroszen et al., 1977; Balzan et al., 2014), was detected in the QTL  
310 of chr2:192.33-192.53Mb for the TEM group. The expression profile of *PINII* for  
311 B73 showed that the gene expressed highly in the SAM and internode, indicating that  
312 the gene was likely to have controlled plant height, especially in later development.

313 Second, different QTLs controlled plant height in different groups. We found that  
314 few QTLs for the three populations overlapped in the same stage. For the PH trait  
315 across four stages, there were more QTLs detected in the other two groups than  
316 BOTH group except in the first stage (Fig. 6). The reason may be different GWAS  
317 model used for the three groups, and the model used for BOTH group was strict than  
318 the other two groups with population structure be considered. In addition, for the  
319 similar model of TEM and TST groups, the QTLs were still different, which may be  
320 caused by the allele frequencies. For example, the QTL chr2: 192.33-192.53 Mb  
321 (containing *PINII*) was only detected in the TEM group at the R stage. The allele  
322 frequencies of the peak SNP (chr2.S\_192432591, A/G) were 0.52/0.47 in the TEM  
323 group, 0.16/0.85 in the TST.

324 Third, we have found considerable overlap between PH, IPH, GRPH, IDPH and  
325 DGRPH (Fig. 7; Fig. S5). Based on the correlations between the five class traits, and  
326 the results of co-localization of QTLs, we can obtain a systematic understanding of  
327 the genetic basis of traits. For example, the QTL region chr2:2.49-4.36 Mb was  
328 co-located by PH\_4, IPH\_3t4 and GRPH\_3t4, which contained the auxin  
329 corresponding factor gene *ARFTF4* (Auxin response factor 4; Li et al., 2016),  
330 indicating that the plant height at the R stage was mainly contributed by the difference  
331 of the growth rate of V12 to R stages rather than other periods. These results indicate  
332 that the plant height surveyed at a specific stage was affected by many factors, such as  
333 IPH and the plant height at the former stage.

334

## 335 Discussion

### 336 High-throughput phenotyping platforms promote genetic research

337 Application of genetic improvement is the most effective way to increase crop  
338 yields. With the fast development of sequencing technology, genomic researches have

339 recently been rapidly increasing; however, the phenotype has been facing bottleneck  
340 (Furbank and Tester, 2011). The development of HTPPs to obtain more phenotypes  
341 has been the focus of the fast development of genetics and breeding.

342 A series of indoor phenotypic platforms have recently been developed and  
343 applied into genetic researches (Chen et al., 2014; Yang et al., 2014; Zhang et al.,  
344 2016). The application of these high-throughput, automated phenotyping devices can  
345 greatly shorten the phenotypic investigation time, ensure the accuracy of the  
346 phenotype, and discover phenotypes that researchers cannot obtain by conventional  
347 techniques. More importantly, the traits discovered by the high throughput platform  
348 can identify some known genes as well as the novel loci, providing a valuable ability  
349 for gene identification.

350 Compared with indoor platforms, the development of field HTPPs will be much  
351 more complex because of the requirement for high flexibility and a large payload  
352 (Araus and Cairns, 2014). To date, UAV has been an excellent tool as field  
353 high-throughput techniques, and has achieved great success in the researches of wheat  
354 and cotton (Andrade-Sanchez et al., 2013; Holman et al., 2016). However, the  
355 applications for UAV in maize plant height research were very few. In this study, we  
356 applied the UAV platform to survey maize plant height in the fields and used the  
357 resultant accurate data for genetic mapping. A large number of reported and many  
358 novel QTLs were detected, showing the advantage of GWAS using the UAV-HTPPs  
359 in mining of plant height loci. The platform is likely to have a wide range of future  
360 applications and can be extended to more complex agronomic traits.

361

### 362 **Dynamic phenotype accelerates the dissection of the genetic basis of plant height**

363 The determination of plant height variation depends on the in-depth investigation  
364 of phenotype. Currently, the survey of plant height typically takes place at the mature  
365 stage, which can obtain stable traits, but a lot of useful plant height information is  
366 likely to be missed. In this study, we monitored the plant height from the seeding  
367 stage to the flowering stage, through division into four periods. We found that GRPH  
368 of maize varies greatly at different stages of development, with the fastest in 1t2 stage,  
369 and slowest in 3t4 stage. Second, we found that TST maize grew slower and had a  
370 shorter plant height than the TEM maize from sowing to jointing stage. However,  
371 from the jointing to the flowering stages, TST maize had a faster growth rate, and  
372 finally resulted in a taller plant than TEM maize. Third, there were different genes

373 regulating the plant height at different stages, some controlling early growth, some  
374 controlling mid-term and some controlling later stages. In this study we have detected  
375 6, 6, 2 and 24 QTLs for the PH traits at V5, V10, V12 and R stages, but no common  
376 QTLs among the four stages. The results were consistent with Yan (Yan et al., 2003),  
377 who investigated plant heights in five periods and found that QTLs controlling plant  
378 heights were expressed differently in different periods. The above results indicate that  
379 if we assess the plant height over different growth stages, we will be able to identify  
380 more genes affecting plant height. Fourth, we found that a few regions can be  
381 co-localized by PH, IPH and GRPH. For example, we found that the co-localized  
382 QTLs controlling later IPH or GRPH were also detected in later PH traits and vice  
383 versa. This indicates that by dividing the plant height into several stages of growth,  
384 the key factors for the plant height can be better identified at specific stages. The  
385 dynamic phenotype enables us to have a clearer understanding of plant developmental  
386 processes. The usage of dynamic phenotypic data for mapping can identify more  
387 QTLs affecting the development of the trait, which is of great importance for the  
388 analysis of the genetic basis of traits and subsequent improvement of the trait.

389

390

391

392

393

394

395

396

397

398

399

400

401

402

403

404

405

406

407 **Acknowledgements**

408 The authors are grateful to Dr. Jianbing Yan for providing the maize natural  
409 population. Thank Dr. Boxiang Xiao for the software of Maize Three-Dimensional  
410 Interactive Digital Design (PlantCAD-maize) which helps to design the digital maize  
411 plants.

412

413 **Author contributions**

414 Y.X.Zhao, G.J.Y, and J.R.Z designed the experiment; R.Y.Z, X.S, K.C and  
415 Y.X.Zhang carried out the field experiment; G.J.Y and L.H conducted the UAV-HTTP.  
416 X.Q.W implement the statistical analysis and GWAS work. X.Q.W and Y.X.Zhao  
417 prepared the initial draft. X.L.L, M.J.L and W.S helped to modify the manuscript.  
418 J.R.Z and W.S provide the foundation support. All authors reviewed the manuscript.

419

420 **Funding**

421 This research was supported by funding from the National Key Research and  
422 Development Program of China (2016YFD0300106); the Science and Technology  
423 Planning Project of Beijing (D161100005716002); the Sci-Tech Innovative Ability  
424 Project (KJCX20170423); the Innovative Team Construction Project of BAAFS  
425 (JNKYT201603), China Agriculture Research System (CARS-02-11); the Beijing  
426 Scholars Program (BSP041).

427

428 **Competing interests**

429 The authors declare no competing financial interests.

430

431

432

433

434

435

436

437

438

439

440

441 **References**

- 442 **Abendroth L, Elmore RW, Boyer M, Marlay SK.** 2011. Corn growth and development.  
443 Iowa State University.
- 444 **Al-Tamimi N, Brien C, Oakey H, Berger B, Saade S, Ho YS, Schmöckel SM, Tester M,**  
445 **Negrão S.** 2016. Salinity tolerance loci revealed in rice using high-throughput non-invasive  
446 phenotyping. *Nature Communications* **17**, 13342.
- 447 **Andradesanchez P, Gore MA, Heun JT, Thorp KR, Carmosilva AE, French AN,**  
448 **Salvucci ES, White JW.** 2014. Development and evaluation of a field-based high-throughput  
449 phenotyping platform. *Functional Plant Biology* **41**, 68-79.
- 450 **Araus JL, Cairns JE.** 2014. Field high-throughput phenotyping: the new crop breeding  
451 frontier. *Trends in Plant Science* **19**, 52-61.
- 452 **Balzan S, Johal GS, Carraro N.** 2014. The role of auxin transporters in monocots  
453 development. *Frontiers in Plant Science* **15**, 393.
- 454 **Bensen RJ, Johal GS, Crane VC, Tossberg JT, Schnable PS, Meeley RB, Briggs SP.** 1995.  
455 Cloning and characterization of the maize An1 gene. *Plant Cell* **7**, 75-84.
- 456 **Bendig J, Bolten A, Bareth G.** 2013. UAV-based imaging for multi-temporal, very high  
457 resolution crop surface models to monitor crop growth variability.  
458 *Photogrammetrie-Fernerkundung-Geoinformation* **6**, 551-562.
- 459 **Chen D, Neumann K, Friedel S, Kilian B, Chen M, Altmann T, Klukas C.** 2014.  
460 Dissecting the phenotypic components of crop plant growth and drought responses based on  
461 high-throughput image analysis. *Plant Cell* **26**, 4636-55.
- 462 **Cristian F, Silvia F, and Serena V.** 2012. The Maize PIN Gene Family of Auxin  
463 Transporters. *Frontiers in Plant Science* **3**, 16.
- 464 **Dell'Acqua M, Gatti DM, Pea G, et al.** 2015. Genetic properties of the MAGIC maize  
465 population: a new platform for high definition QTL mapping in *Zea mays*. *Genome Biology*  
466 **16**, 167.
- 467 **Deng M, Li D, Luo J, Xiao Y, Liu H, Pan Q, Zhang X, Jin M, Zhao M, Yan J.** 2017. The  
468 genetic architecture of amino acids dissection by association and linkage analysis in maize.  
469 *Plant Biotechnology Journal* **15**, 1250-1263.
- 470 **Duan T, Zheng B, Guo W, Ninomiya S, Guo Y, Chapman SC.** 2017. Comparison of ground  
471 cover estimates from experiment plots in cotton, sorghum and sugarcane based on images and  
472 ortho-mosaics captured by UAV. *Functional Plant Biology* **44**, 169-183.
- 473 **Fujioka S, Yamane H, Spray CR, Gaskin P, Macmillan J, Phinney BO, Takahashi N.**  
474 1988. Qualitative and quantitative analyses of gibberellins in vegetative shoots of normal,  
475 dwarf-1, dwarf-2, dwarf-3, and dwarf-5 seedlings of *Zea mays* L. *Plant Physiology*  
476 **88**, 1367-72.
- 477 **Furbank RT, Tester M.** 2011. Phenomics--technologies to relieve the phenotyping

- 478 bottleneck. *Trends in Plant Science* **16**, 635-44.
- 479 **Heuer S, Hansen S, Bantín J, Brettschneider R, Kranz E, Lörz H, Dresselhaus T.** 2001.  
480 The maize MADS box gene *ZmMADS3* affects node number and spikelet development and is  
481 co-expressed with *ZmMADS1* during flower development, in egg cells, and early  
482 embryogenesis. *Plant Physiology* **127**, 33-45.
- 483 **Holman F, Riche A, Michalski A, Castle M, Wooster M, Hawkesford M.** 2016. High  
484 throughput field phenotyping of wheat plant height and growth rate in field plot trials using  
485 UAV based remote sensing. *Remote Sensing of Environment* **8**, 1031.
- 486 **Hoffmeister D, Bolten A, Curdt C, Waldhoff G, Bareth G.** 2010. High-resolution Crop  
487 Surface Models (CSM) and Crop Volume Models (CVM) on field level by terrestrial laser  
488 scanning. *International Society for Optics and Photonics* **7840**, 78400E.
- 489 **Hoffmeister D, Waldhoff G, Curdt C, Tilly N, Bendig J, Bareth G.** 2013. Spatial  
490 variability detection of crop height in a single field by terrestrial laser scanning. In *Precision*  
491 *agriculture'13*. Wageningen Academic Publishers, Wageningen, 267-274.
- 492 **Hung HY, Shannon LM, Tian F, et al.** 2012. *ZmCCT* and the genetic basis of day-length  
493 adaptation underlying the postdomestication spread of maize. *Proceedings of the National*  
494 *Academy of Sciences of the United States of America* **109**, 1913-1921.
- 495 **Juarez MT, Kui JS, Thomas J, Heller BA, Timmermans MC.** 2004. microRNA mediated  
496 repression of *rolled leaf1* specifies maize leaf polarity. *Nature* **428**, 84-8.
- 497 **Khush GS.** 2001. Green revolution: the way forward. *Nature Reviews Genetics* **2**, 815-22.
- 498 **Li SB, Xie ZZ, Hu CG, Zhang JZ.** 2016. A review of auxin response factors (ARFs) in  
499 plants. *Frontiers in Plant Science* **3**, 7:47
- 500 **Liang Z, Pandey P, Stoerger V, Xu Y, Qiu Y, Ge Y, Schnable JC.** 2018. Conventional and  
501 hyperspectral time-series imaging of maize lines widely used in field trials. *Gigascience* **7**,  
502 1-11.
- 503 **Liu H, Wang X, Warburton ML, et al.** 2015. Genomic, transcriptomic, and phenomic  
504 variation reveals the complex adaptation of modern maize breeding. *Molecular Plant* **8**,  
505 871-884.
- 506 **Liu H, Luo X, Niu L, et al.** 2017. Distant eQTLs and Non-coding Sequences Play Critical  
507 Roles in Regulating Gene Expression and Quantitative Trait Variation in Maize. *Molecular*  
508 *Plant* **6**, 414-426.
- 509 **Liu X, Huang M, Fan B, Buckler ES, Zhang Z.** 2016. Iterative usage of fixed and random  
510 effect models for powerful and efficient genome-wide association studies. *PLoS Genetics* **12**,  
511 e1005767.
- 512 **Lo SF, Yang SY, Chen KT, Hsing YI, Zeevaart JA, Chen LJ, Yu SM.** 2008. A novel class  
513 of gibberellin 2-oxidases control semidwarfism, tillering, and root development in rice. *Plant*  
514 *Cell* **20**, 2603-18.

- 515 **Mizutani M.** 2012. Impacts of diversification of cytochrome P450 on plant metabolism.  
516 *Biological & Pharmaceutical Bulletin* **35**, 824-32.
- 517 **Pan Q, Xu Y, Li K, Peng Y, Zhan W, Li W, Li L, Yan J.** 2017. The Genetic Basis of Plant  
518 Architecture in 10 Maize Recombinant Inbred Line Populations. *Plant Physiology* **175**,  
519 858-873.
- 520 **Peiffer JA, Romay MC, Gore MA, et al.** 2014. The genetic architecture of maize height.  
521 *Genetics* **196**, 1337-56.
- 522 **Peng J, Richards DE, Hartley NM, et al.** 1999. 'Green revolution' genes encode mutant  
523 gibberellin response modulators. *Nature* **15**, 256-61.
- 524 **Salas Fernandez MG, Becraft PW, Yin Y, Lübberstedt T.** 2009. From dwarves to giants?  
525 Plant height manipulation for biomass yield. *Trends in Plant Science* **14**, 454-61.
- 526 **Sasaki A, Ashikari M, Ueguchi-Tanaka M, et al.** 2002. Green revolution: a mutant  
527 gibberellin-synthesis gene in rice. *Nature* **18**, 701-2.
- 528 **Schoof H, Lenhard M, Haecker A, Mayer K F, Jürgens G, Laux T.** 2000. The stem cell  
529 population of Arabidopsis shoot meristems is maintained by a regulatory loop between the  
530 CLAVATA and WUSCHEL genes. *Cell* **100**, 635-44.
- 531 **Sharma VK, Carles C, Fletcher JC.** 2003. Maintenance of stem cell populations in plants.  
532 *Proceedings of the National Academy of Sciences of the United States of America* **100**,  
533 11823–11829.
- 534 **Tester M, Langridge P.** 2010. Breeding technologies to increase crop production in a  
535 changing world. *Science* **12**, 818-22.
- 536 **Tudroszen NJ, Kelly DP, Millis NF.** 1977. alpha-Pinene metabolism by *Pseudomonas putida*.  
537 *Biochemical Journal* **15**, 315-8.
- 538 **van Heerwaarden J, Doebley J, Briggs WH, Glaubitz JC, Goodman MM, de Jesus**  
539 **Sanchez Gonzalez J, Ross-Ibarra J.** 2011. Genetic signals of origin, spread, and  
540 introgression in a large sample of maize landraces. *Proceedings of the National Academy of*  
541 *Sciences of the United States of America* **18**, 1088-92.
- 542 **Watanabe K, Guo W, Arai K, et al.** 2017. High-throughput phenotyping of sorghum plant  
543 height using an unmanned aerial vehicle and its application to genomic prediction modeling.  
544 *Frontiers in Plant Science* **8**, 421.
- 545 **Winkler RG, Freeling M.** 1994. Physiological genetics of the dominant  
546 gibberellin-nonresponsive maize dwarfs, Dwarf8 and Dwarf9. *Planta* **193**, 341-348.
- 547 **Wei X, Xu J, Guo H, Jiang L, Chen S, Yu C, Zhou Z, Hu P, Zhai H, Wan J.** 2010. DTH8  
548 suppresses flowering in rice, influencing plant height and yield potential simultaneously. *Plant*  
549 *Physiology* **153**, 1747-58.
- 550 **Weijers D, Nemhauser J, Yang Z.** 2018. Auxin: small molecule, big impact. *Journal of*  
551 *Experimental Botany* **69**, 133-136.



552 **Winkler RG, Helentjaris T.** 1995. The maize Dwarf3 gene encodes a cytochrome  
553 P450-mediated early step in gibberellin biosynthesis. *Plant Cell* **7**, 1307-17.

554 **Woebbecke DM, Meyer GE, Von Bargaen K, Mortensen DA.** 1995. Color indices for weed  
555 identification under various soil, residue, and lighting conditions. *Transactions of the ASAE*,  
556 **38**, 259-269.

557 **Xing A, Gao Y, Ye L, et al.** 2015. A rare SNP mutation in Brachytic2 moderately reduces  
558 plant height and increases yield potential in maize. *Journal of Experimental Botany* **66**,  
559 3791-802.

560 **Yamaguchi S.** 2008. Gibberellin metabolism and its regulation. *Annual Review of Plant*  
561 *Biology* **59**, 225-251.

562 **Yan J, Tang H, Huang Y, Shi Y, Li J, Zheng Y.** 2003. Dynamic analysis of QTL for plant  
563 height at different developmental stages in maize (*Zea mays* L.). *Chinese Science Bulletin* **48**,  
564 2601-2607.

565 **Yang N, Lu Y, Yang X, Huang J, Zhou Y, Ali F, Wen W, Liu J, Li J, Yan J.** 2014. Genome  
566 wide association studies using a new nonparametric model reveal the genetic architecture of  
567 17 agronomic traits in an enlarged maize association panel. *PLoS Genetics*, **10**, e1004573.

568 **Yang X, Gao S, Xu S, Zhang Z, Prasanna BM, Li L, Li J, Yan J.** 2011. Characterization of  
569 a global germplasm collection and its potential utilization for analysis of complex quantitative  
570 traits in maize. *Molecular Breeding* **28**, 511-526.

571 **Yang W, Guo Z, Huang C, et al.** 2014. Combining high-throughput phenotyping and  
572 genome-wide association studies to reveal natural genetic variation in rice. *Nature*  
573 *Communications* **8**, 5087.

574 **Zhang J, Cheng Z, Zhang R.** 2012. Regulated deficit drip irrigation influences on seed  
575 maize growth and yield under film. *Procedia Engineering* **28**, 464-468.

576 **Zhou Z, Zhang C, Zhou Y, et al.** 2016. Genetic dissection of maize plant architecture with  
577 an ultra-high density bin map based on recombinant inbred lines. *BMC Genomics* **3**, 178.

578  
579  
580  
581  
582  
583  
584  
585  
586  
587  
588

589 **Table 1** . The investigation date for plant height

| <b>Flight</b> | <b>Date</b>   | <b>DAS<sup>a</sup></b> | <b>DAFD<sup>b</sup></b> | <b>Development stage</b> | <b>Description</b> |
|---------------|---------------|------------------------|-------------------------|--------------------------|--------------------|
| 1             | 8 June 2017   | 24                     | —                       | V5                       | seeding stage      |
| 2             | 29 June 2017  | 45                     | 21                      | V10                      | jointing stage     |
| 3             | 11 July 2017  | 57                     | 12                      | V12                      | trumpet            |
| 4             | 3 August 2017 | 80                     | 23                      | R                        | flowering stage    |

590 Note:

591 a: DAS means days after sowing

592 b: DAFD means days after the closest former date

593

594 **Table 2.** Features for the extraction for the plant height using UAV-HTTP

| <b>Flight</b> | <b>Flight<br/>Altitude<br/>(m)</b> | <b>Original<br/>images<br/>quantity</b> | <b>Checked<br/>images<br/>quantity</b> | <b>Orthomosaic<br/>Resolution<br/>(cm/pixel)</b> | <b>Point<br/>Density<br/>(points/cm-2)</b> | <b>DSM<br/>Resolution<br/>(cm/pixel)</b> | <b>Min of<br/>CSM<br/>(cm)</b> | <b>Max of<br/>CSM<br/>(cm)</b> | <b>CV of<br/>CSM<br/>(%)</b> | <b>Mean of<br/>CSM(cm)</b> |
|---------------|------------------------------------|-----------------------------------------|----------------------------------------|--------------------------------------------------|--------------------------------------------|------------------------------------------|--------------------------------|--------------------------------|------------------------------|----------------------------|
| 1             | 40                                 | 166                                     | 120                                    | 0.72                                             | 47.9                                       | 1.44                                     | 0                              | 26                             | 53                           | 9.6                        |
| 2             | 60                                 | 113                                     | 98                                     | 1.33                                             | 14.2                                       | 2.65                                     | 69                             | 184                            | 13.4                         | 124.9                      |
| 3             | 60                                 | 121                                     | 95                                     | 1.35                                             | 13.7                                       | 2.71                                     | 117                            | 251                            | 11.6                         | 185.9                      |
| 4             | 50                                 | 159                                     | 147                                    | 1.23                                             | 16.4                                       | 2.47                                     | 148                            | 365                            | 14.5                         | 253.4                      |

595

596 **Table 3.** Statistic analysis for plant height variation for the whole population during  
597 four growth stages

| <b>Trait</b> | <b>Max<br/>(cm)</b> | <b>Min<br/>(cm)</b> | <b>Mean<br/>(cm)</b> | <b>Sd<br/>(cm )</b> | <b>CV<br/>(%)</b> |
|--------------|---------------------|---------------------|----------------------|---------------------|-------------------|
| PH_1         | 31.34               | 5.35                | 13.66                | 5.07                | 37.09             |
| PH_2         | 149.99              | 54.28               | 90.42                | 15.46               | 17.1              |
| PH_3         | 212.56              | 96.52               | 146.98               | 22.63               | 15.4              |
| PH_4         | 325.01              | 112.9               | 218.26               | 35.58               | 16.3              |
| IPH_1t2      | 125.98              | 44.45               | 77.35                | 13.59               | 17.57             |
| IPH_2t3      | 89.79               | 11.25               | 56.85                | 14.54               | 25.58             |
| IPH_3t4      | 153.81              | 0.26                | 71.57                | 32.76               | 45.78             |
| DIPH_1t2     | 6                   | 2.12                | 3.68                 | 0.65                | 17.57             |
| DIPH_2t3     | 7.48                | 0.94                | 4.74                 | 1.21                | 25.58             |
| DIPH_3t4     | 6.69                | 0.01                | 3.11                 | 1.42                | 45.78             |
| GRPH_1t2     | 16.05               | 2.26                | 6.47                 | 2.7                 | 41.75             |
| GRPH_2t3     | 1.32                | 0.12                | 0.64                 | 0.18                | 28.47             |
| GRPH_3t4     | 1.27                | 0                   | 0.51                 | 0.25                | 49.61             |
| DGRPH_1t2    | 0.76                | 0.11                | 0.31                 | 0.13                | 41.75             |
| DGRPH_2t3    | 0.11                | 0.01                | 0.05                 | 0.02                | 28.47             |
| DGRPH_3t4    | 0.06                | 0                   | 0.02                 | 0.01                | 49.61             |

598

599

600 **Figure legends**

601

602 **Fig. 1 Field high-throughput phenotyping for plant height.** A, digital designed  
603 graphs for the maize plants during the four stages. B, the UAV equipment and the  
604 plant height extraction process. The main process contained the image collection by  
605 the UAV, then divided the pictures into the mosaic plots, and extracted plant height  
606 based on the formula (CSM=DSM-DEM). C, Dynamic plant height and QTL  
607 dissection. The whole procedure included trait variation and correlation analysis, as  
608 well as GWAS.

609

610 **Fig. 2 Linear relationship for plant height by UVA and manual measurement by**  
611 **ruler at three growth stages.** The blue solid line represents the regression line, and  
612 the grey shadow represents the 99% confidence interval.

613

614 **Fig. 3 Correlation coefficient matrix among 16 plant-height-related traits.** Yellow  
615 and blue indicate positive and negative correlations, respectively, and the size of the  
616 circle is proportional to the correlation coefficient. The number indicates the  
617 correlation coefficient.

618

619 **Fig. 4 Plant height and its related trait variations between the TEM and TST**  
620 **populations at four growth stages.** Blue and red represent the TEM and TST  
621 populations, respectively. The line in the box plots show the median value. Box edges  
622 represent the first and third quartiles, and the dots outside the whiskers represent the  
623 value over  $1.5 \times$  interquartile range. Stars means phenotypic distribution has  
624 significantly difference below 0.05.

625

626 **Fig. 5 Genome-wide association study for the plant heights at the four stages**  
627 **among the TEM, TST and BOTH groups.** Different colors represent different  
628 chromosomes. The dotted line is the threshold. SNPs above the threshold showed  
629 significant association ones.

630

631 **Fig. 6 Number of QTL for plant height among the three groups (TEM, TST and**  
632 **BOTH) for four stages.** A, the number and proportion of QTLs for the three groups.  
633 B, the QTLs for each group at each of the four stages.

634 **Fig. 7 The venn graph of QTLs for PH, IPH and GRPH traits.**

635

636

## A The 4 growth stages for maize

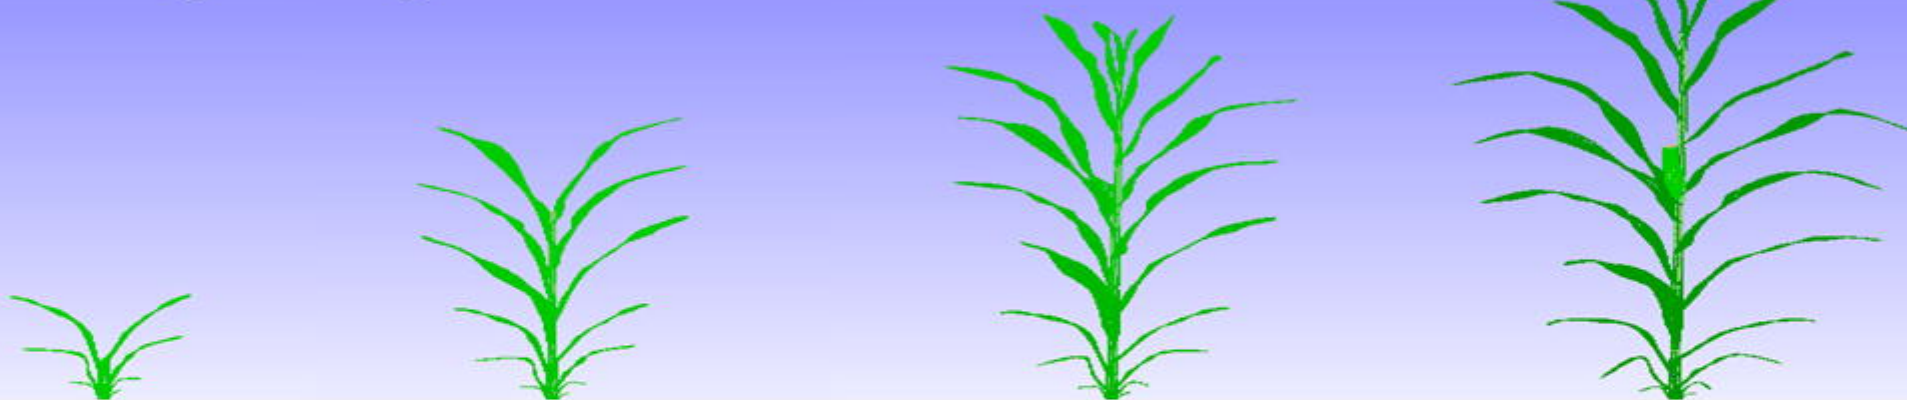

## B UAV and the plant height extraction process

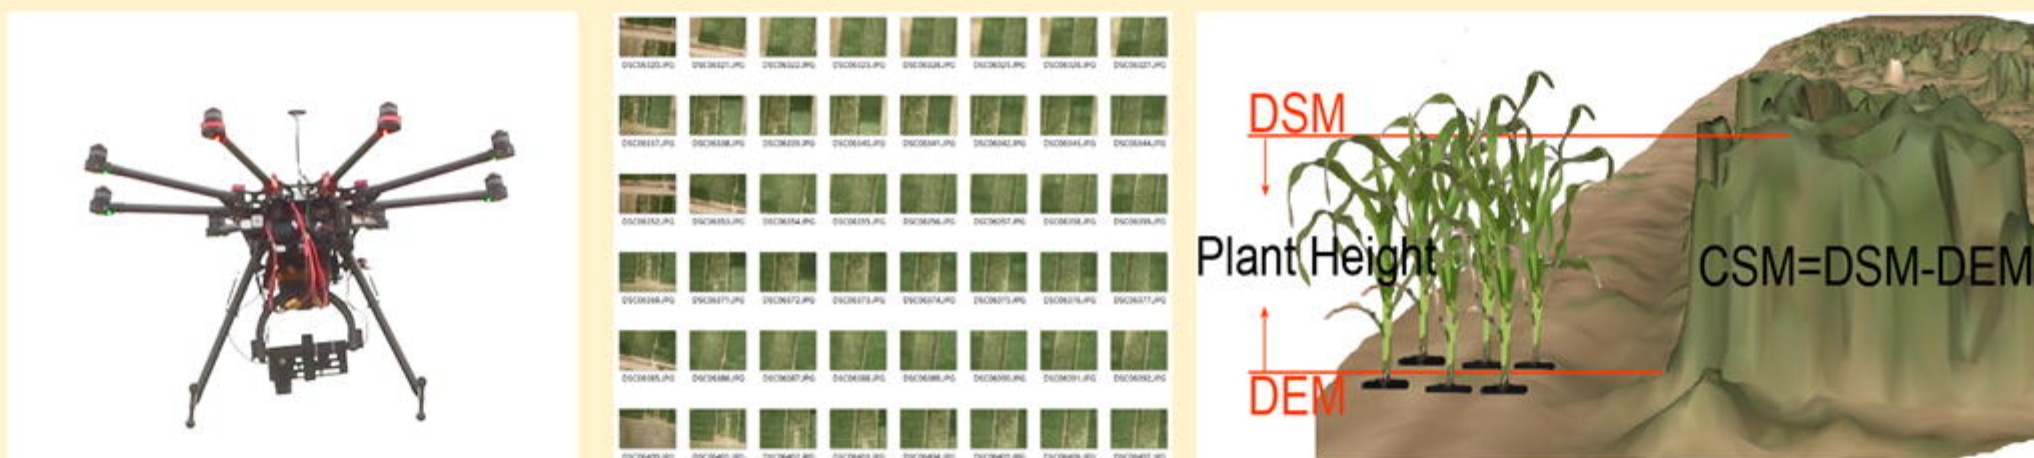

## C Dynamic plant height and its QTL dissection

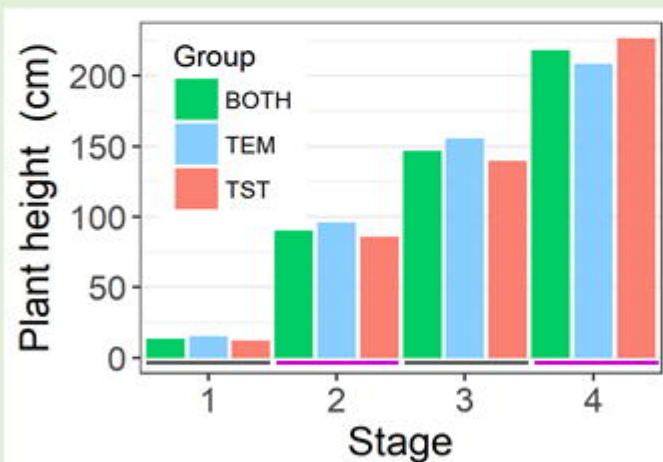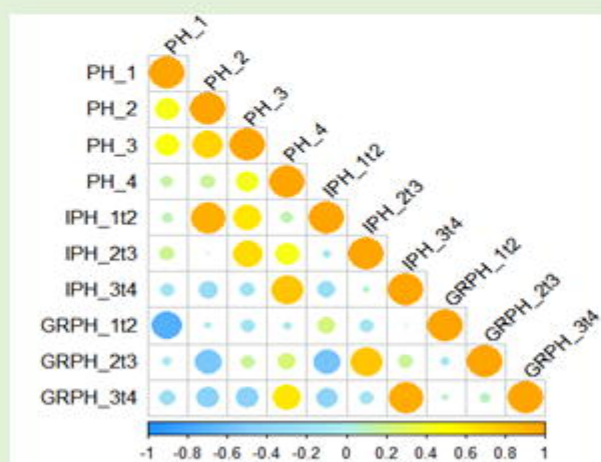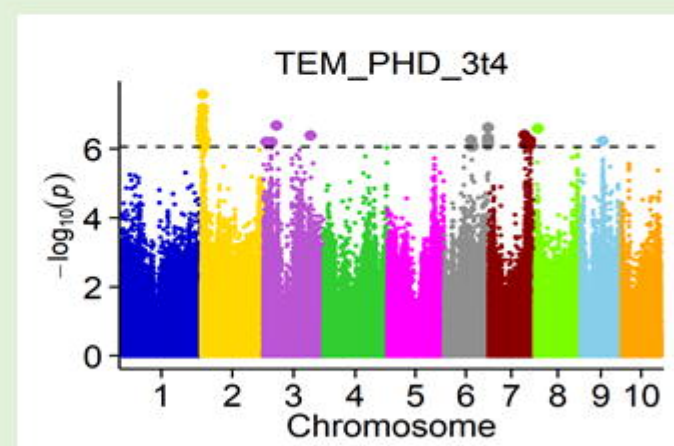

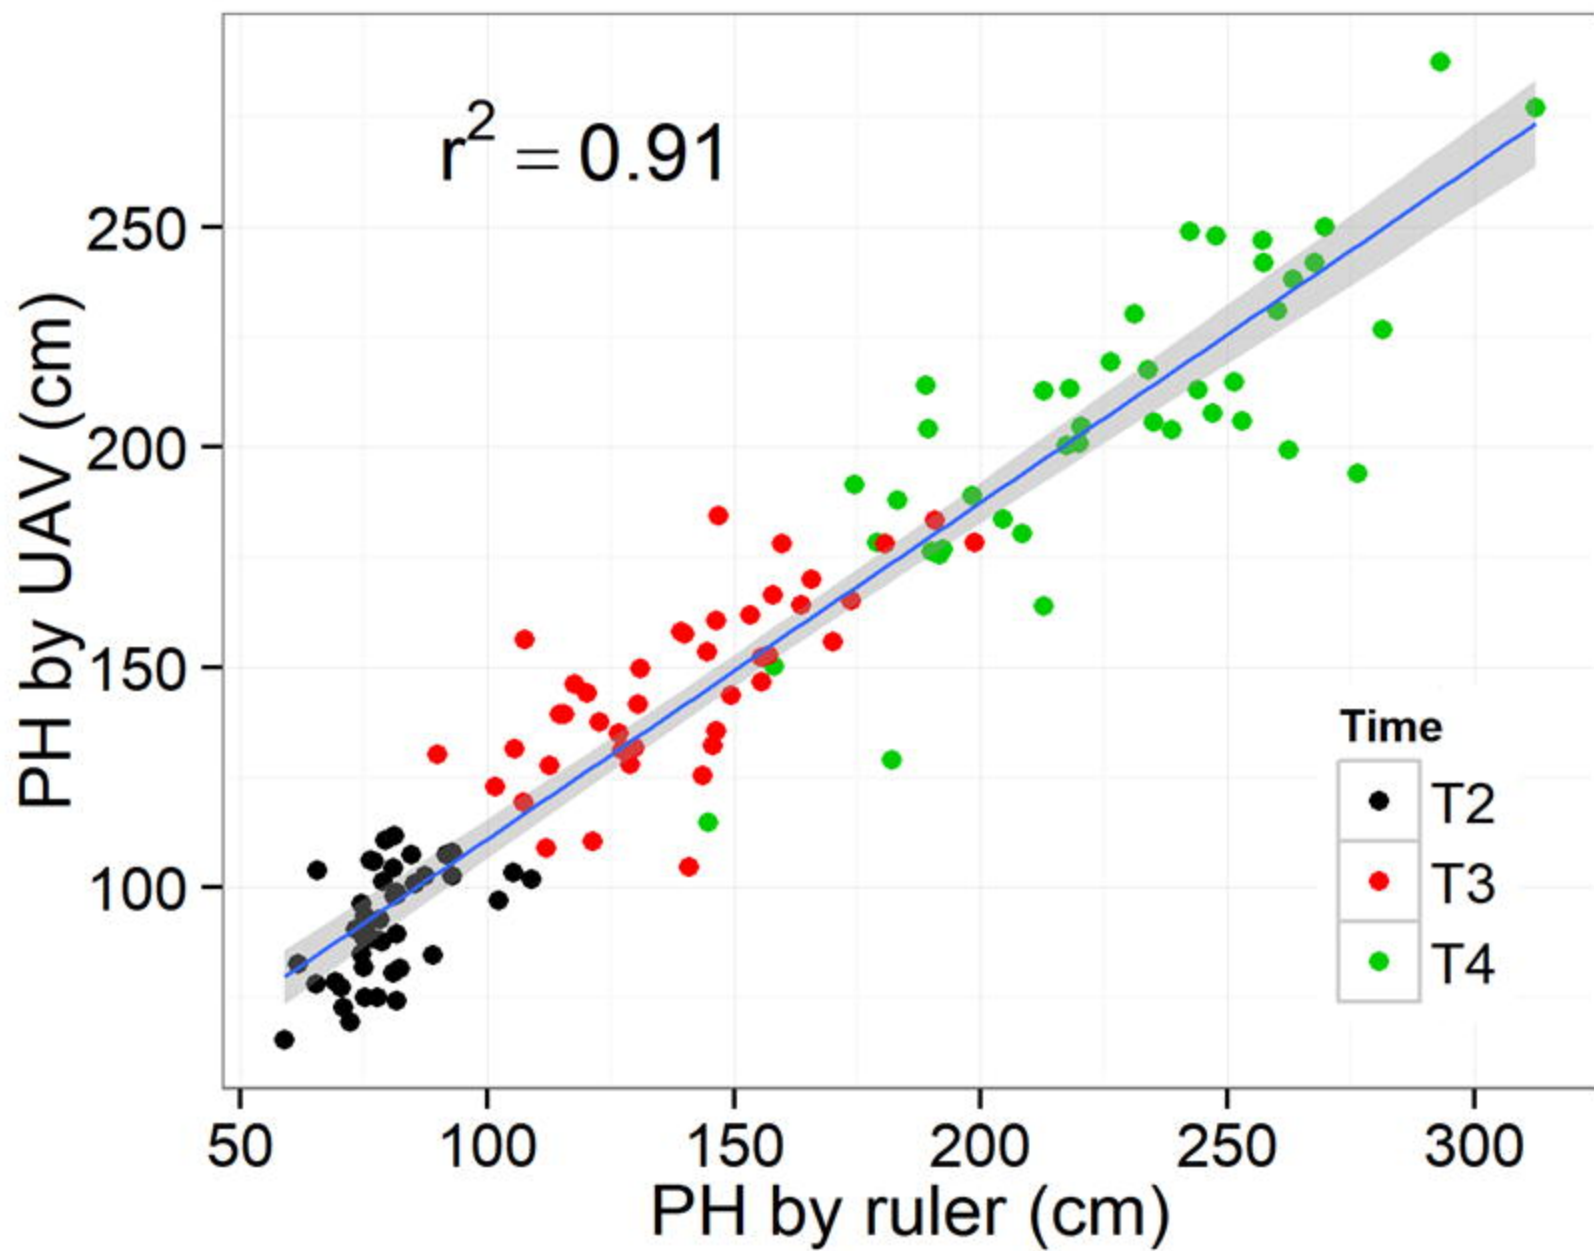



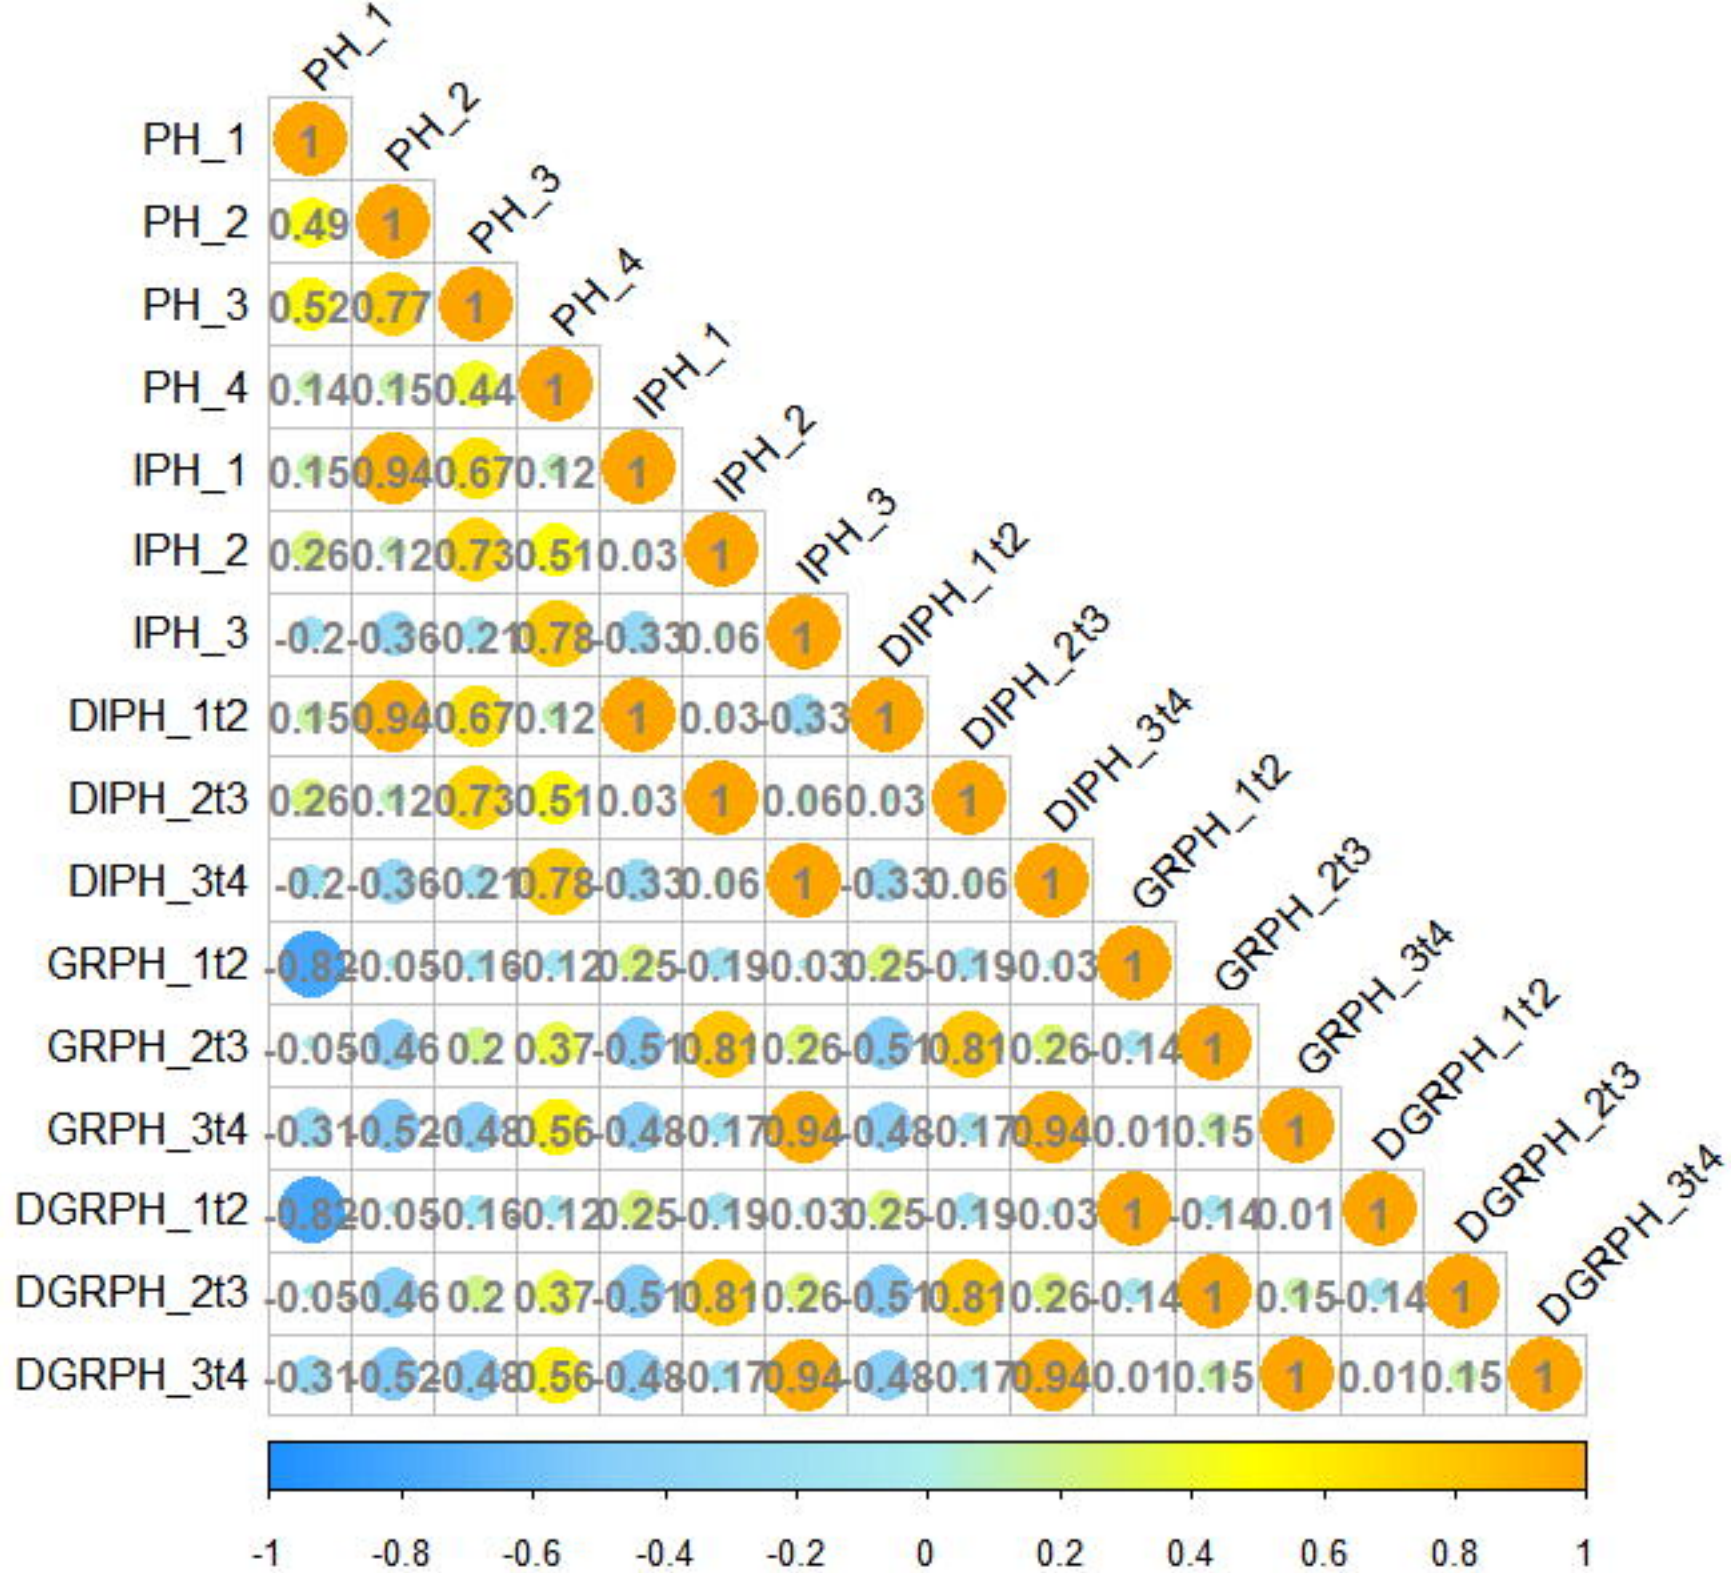



TEM\_PH\_1

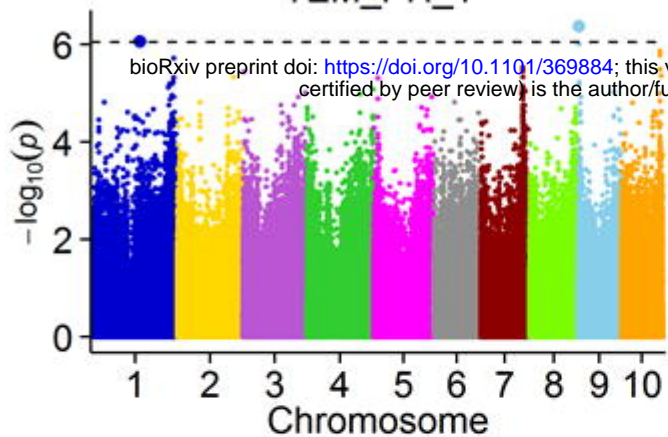

TST\_PH\_1

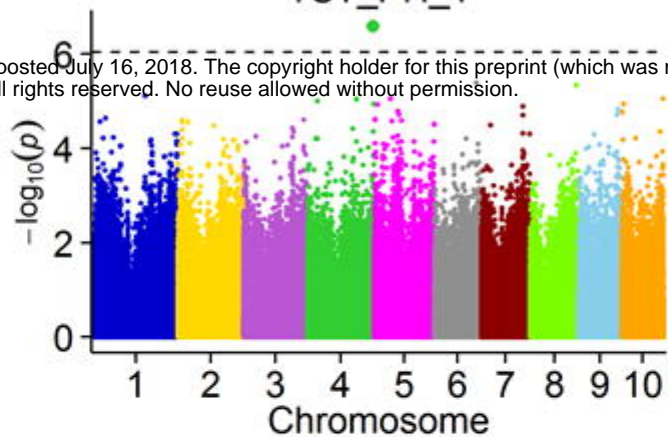

BOTH\_PH\_1

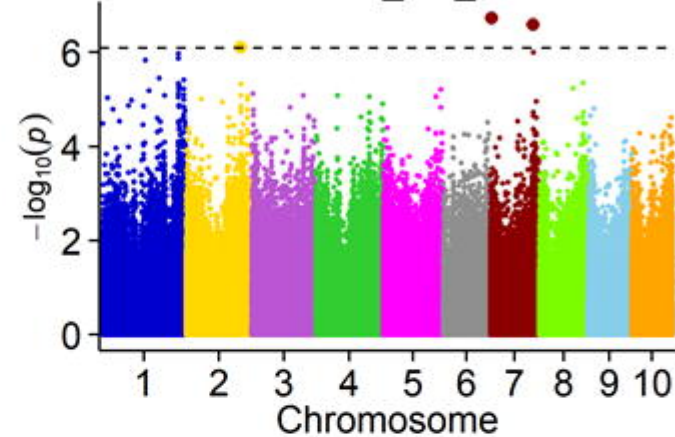

TEM\_PH\_2

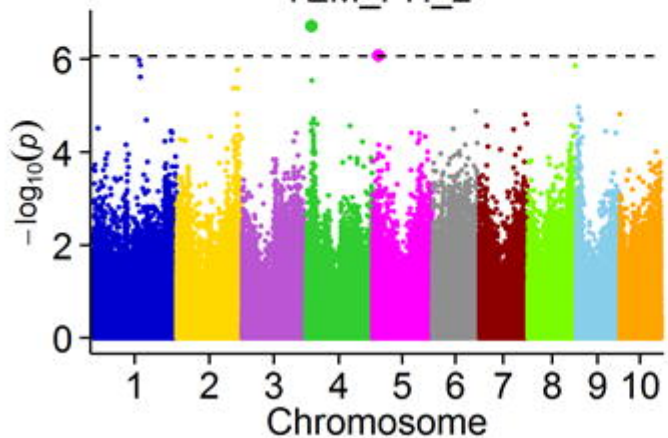

TST\_PH\_2

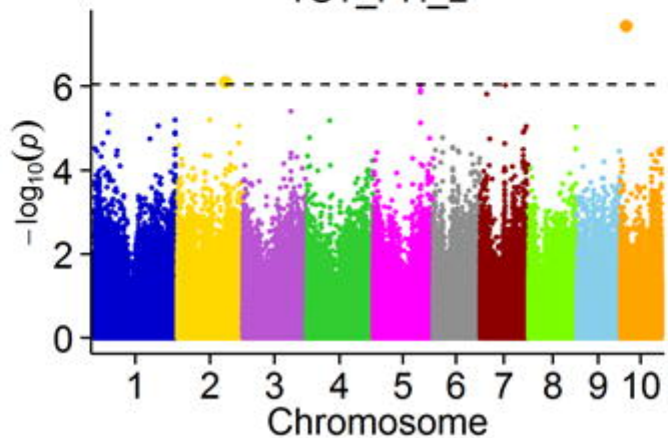

BOTH\_PH\_2

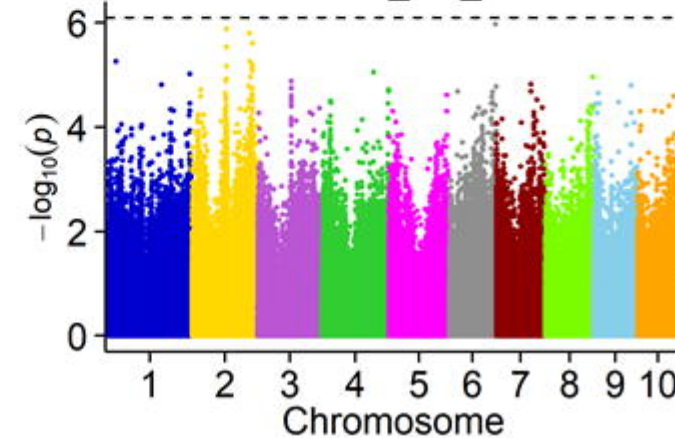

TEM\_PH\_3

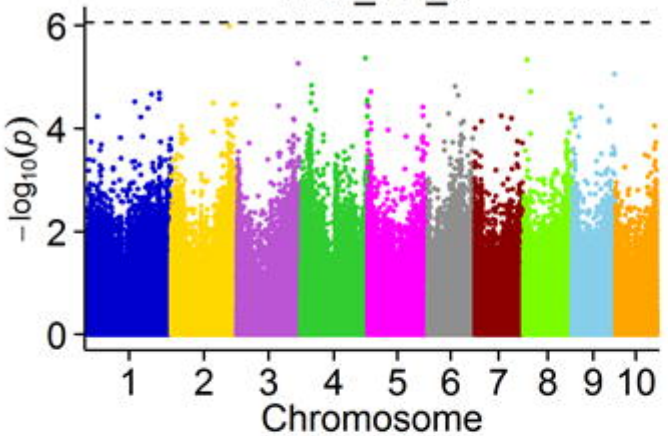

TST\_PH\_3

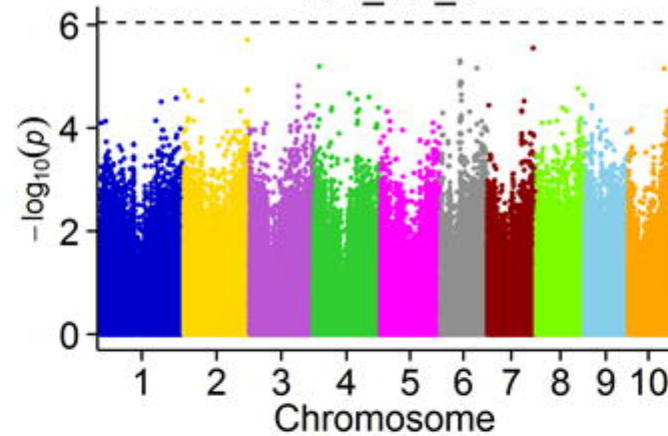

BOTH\_PH\_3

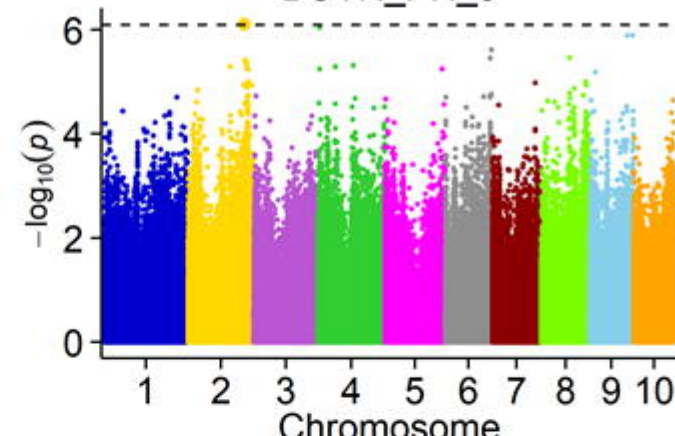

TEM\_PH\_4

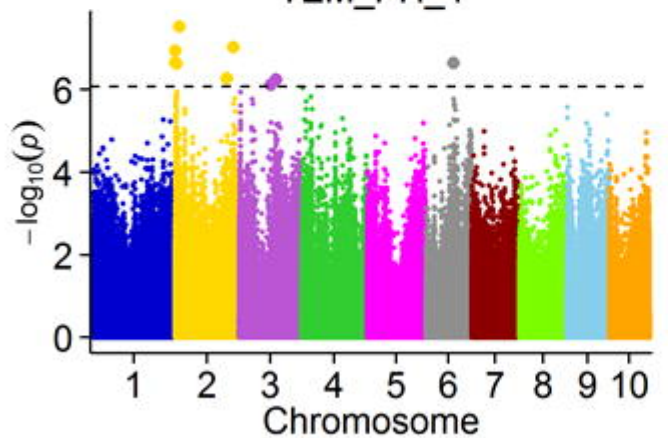

TST\_PH\_4

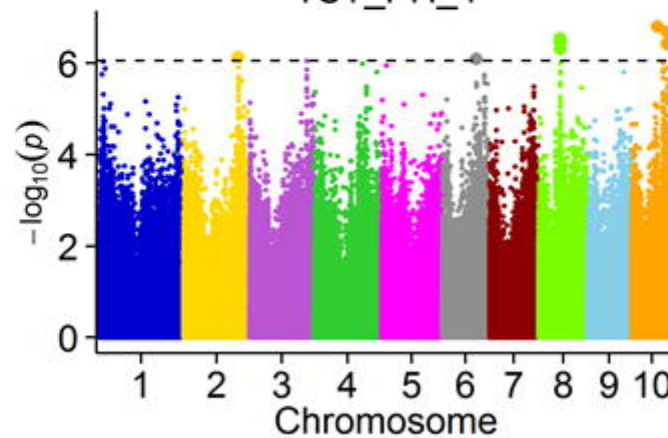

BOTH\_PH\_4

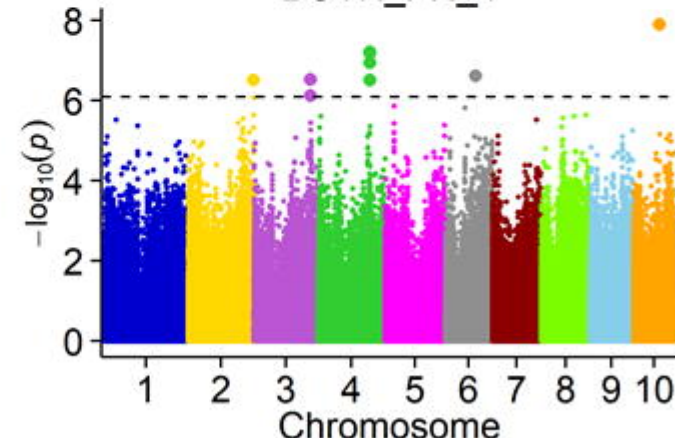

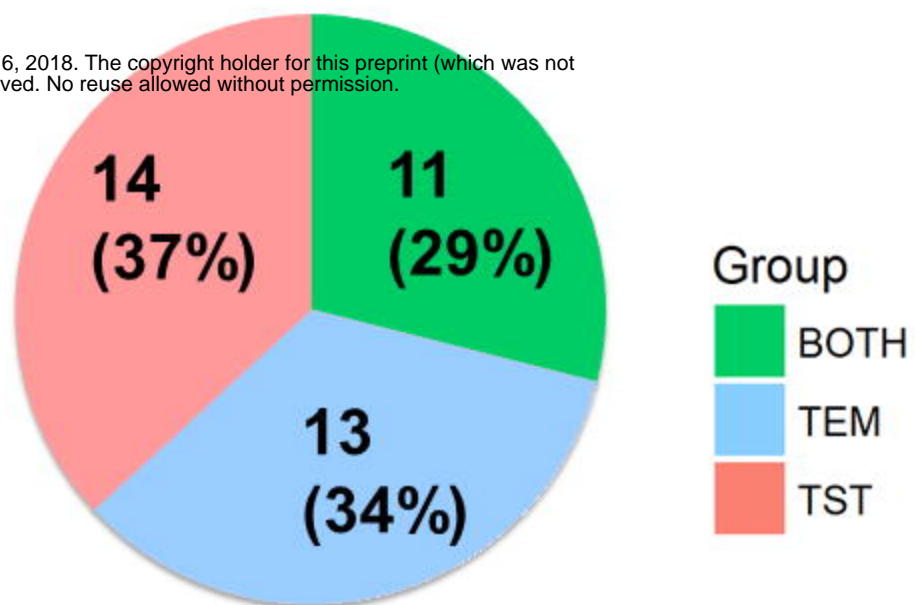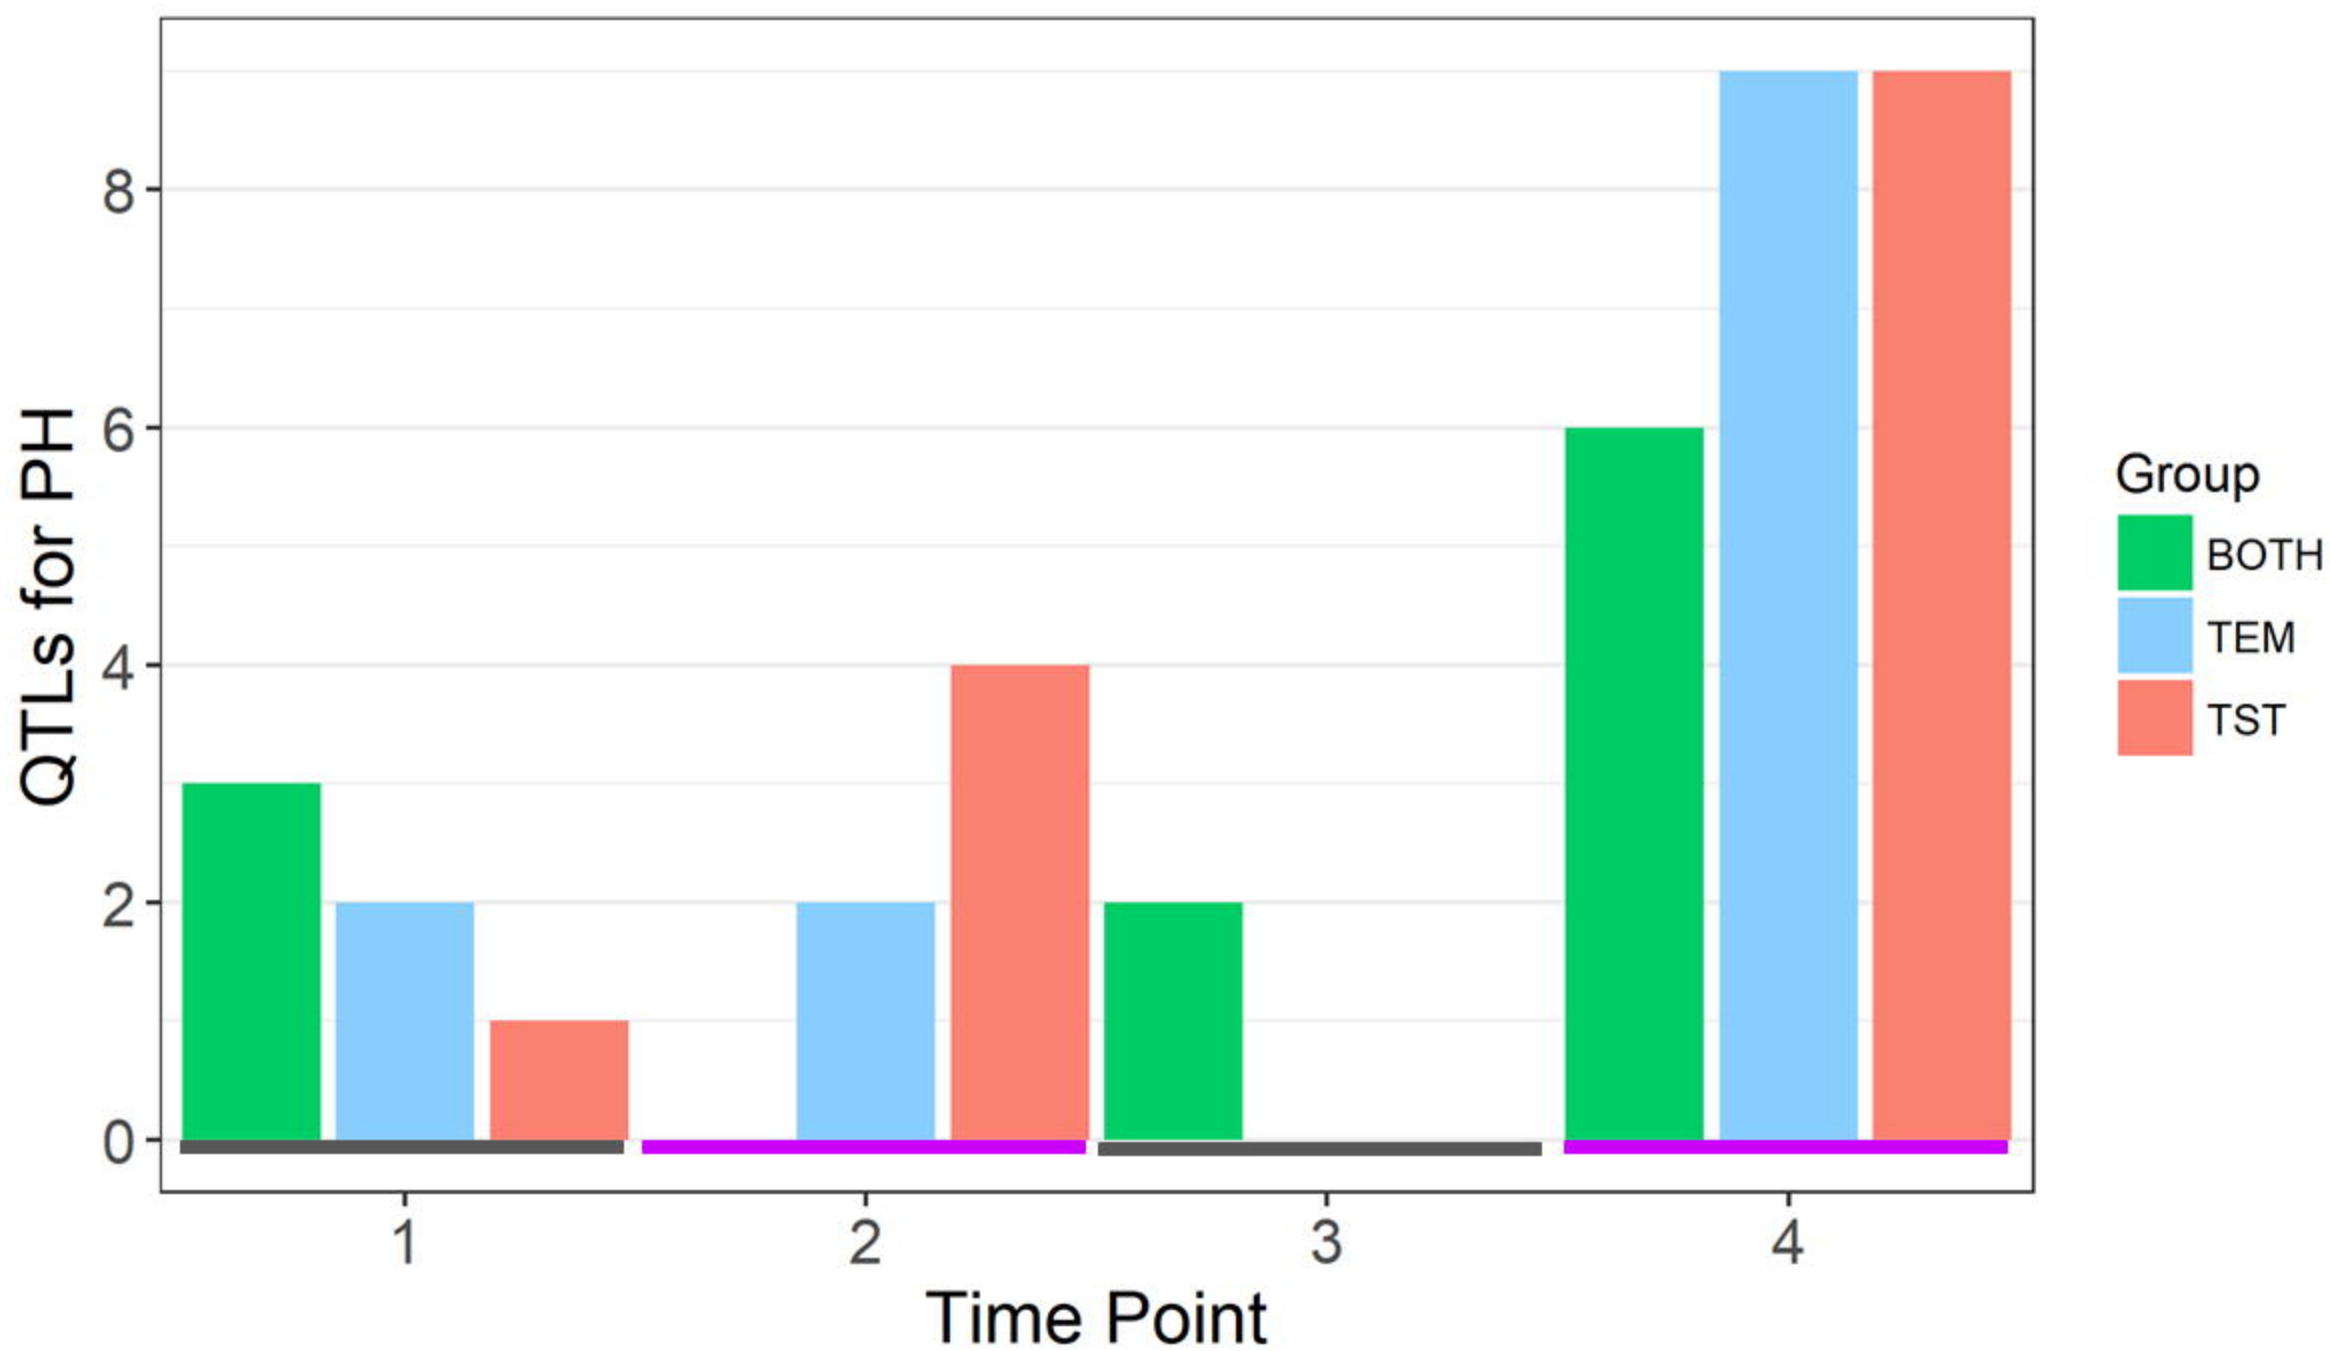

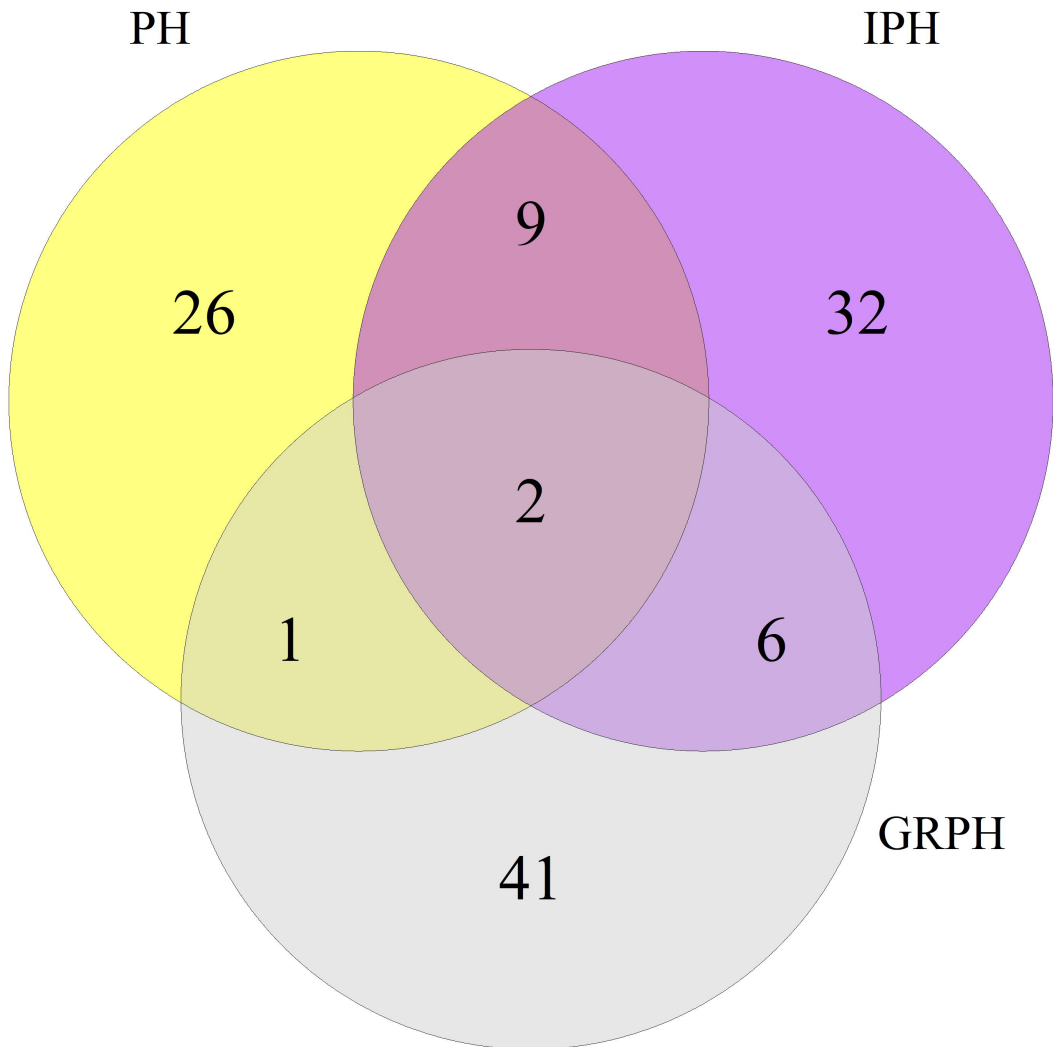

Source: https://biorxiv.org/content/biorxiv/early/2018/07/16/369884.full-text.pdf
